# Supplementary material for: Ag3PO4-Deposited TiO2@Ti3C2 Petals for Highly Efficient Photodecomposition of Various Organic Dyes under Solar Light
Source: MDPI journal article supplement (doi:10.3390/nano12142464), 2022-07-18
Supplement: s1 [file s1]

Supplementary Information for:

# Ag<sub>3</sub>PO<sub>4</sub>-Deposited TiO<sub>2</sub>@Ti<sub>3</sub>C<sub>2</sub> Petals for Highly Efficient Photodecomposition of Various Organic Dyes under Solar Light

Ngoc Tuyet Anh Nguyen and Hansang Kim \*

Department of Mechanical Engineering, Gachon University, Seongnam 13120, Korea; anh2510@gachon.ac.kr

\* Correspondence: hskim70@gachon.ac.kr; Tel.: +82-31-750-5307

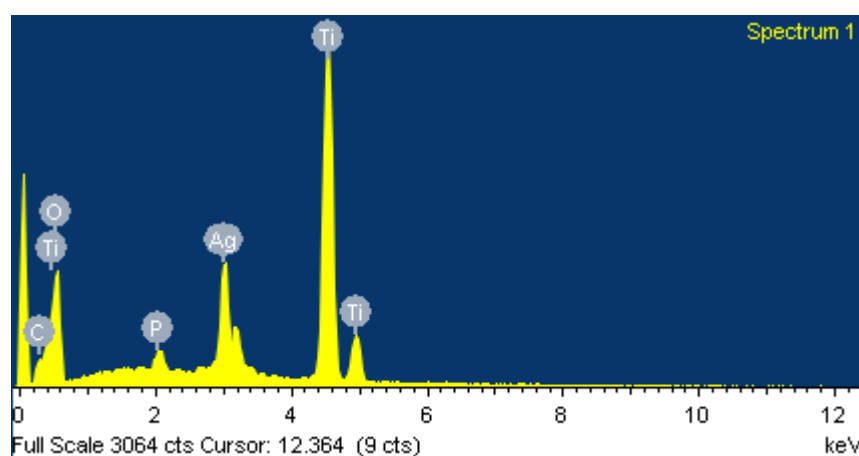

**Citation:** Nguyen, N.T.A.; Kim, H. Ag<sub>3</sub>PO<sub>4</sub>-Deposited TiO<sub>2</sub>@Ti<sub>3</sub>C<sub>2</sub> Petals for Highly Efficient Photodecomposition of Various Organic Dyes under Solar Light. *Nanomaterials* **2022**, *12*, 2464. <https://doi.org/10.3390/nano12142464>

Academic Editors: Junying Zhang, Yong Chen and Jungang Hou

Received: 1 June 2022

Accepted: 9 July 2022

Published: 18 July 2022

**Publisher's Note:** MDPI stays neutral with regard to jurisdictional claims in published maps and institutional affiliations.

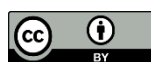

**Copyright:** © 2022 by the authors. Submitted for possible open access publication under the terms and conditions of the Creative Commons Attribution (CC BY) license (<https://creativecommons.org/licenses/by/4.0/>).

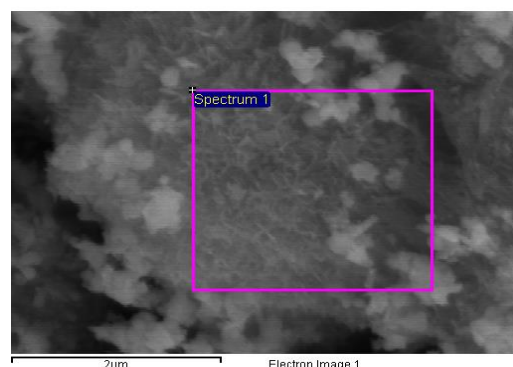

| Element | Atomic% |
|---------|---------|
| C K     | 6.61    |
| O K     | 62.10   |
| P K     | 0.89    |
| Ti K    | 26.21   |
| Ag L    | 4.18    |

**Figure S1.** EDS patterns of Ag<sub>3</sub>PO<sub>4</sub>/TiO<sub>2</sub>@Ti<sub>3</sub>C<sub>2</sub> (sample A4); the inset image shows a SEM image of the sample.

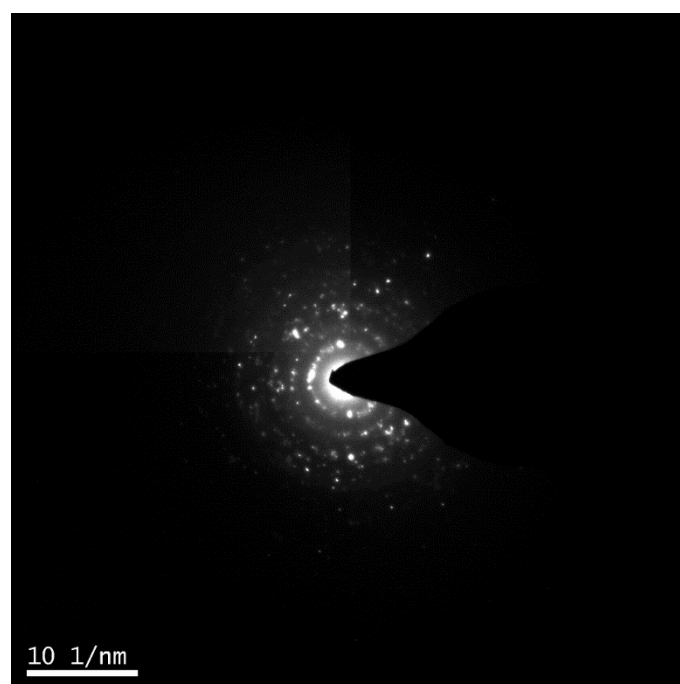

**Figure S2.** SAED image of  $\text{Ag}_3\text{PO}_4/\text{TiO}_2/\text{Ti}_3\text{C}_2$  (sample A4) taken of an arbitrary area.

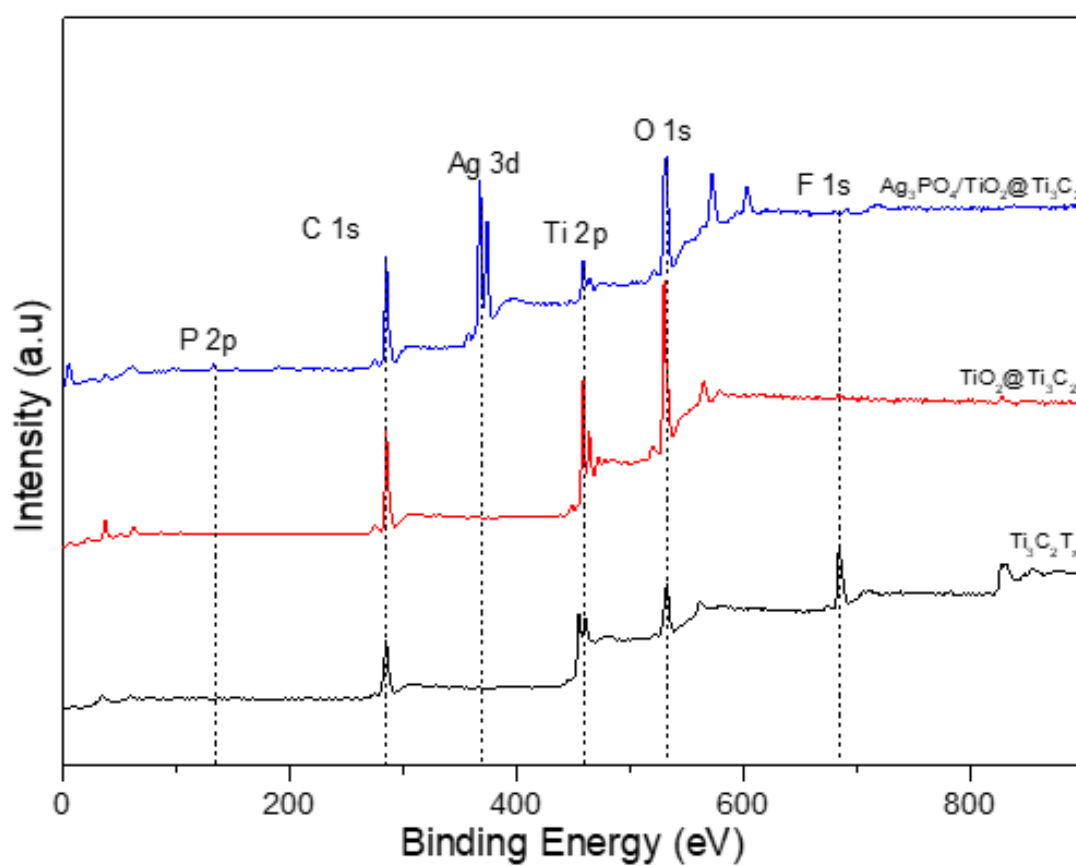

**Figure S3.** XPS survey spectra of  $\text{Ti}_3\text{C}_2$ ,  $\text{TiO}_2/\text{Ti}_3\text{C}_2$  and  $\text{Ag}_3\text{PO}_4/\text{TiO}_2/\text{Ti}_3\text{C}_2$ .

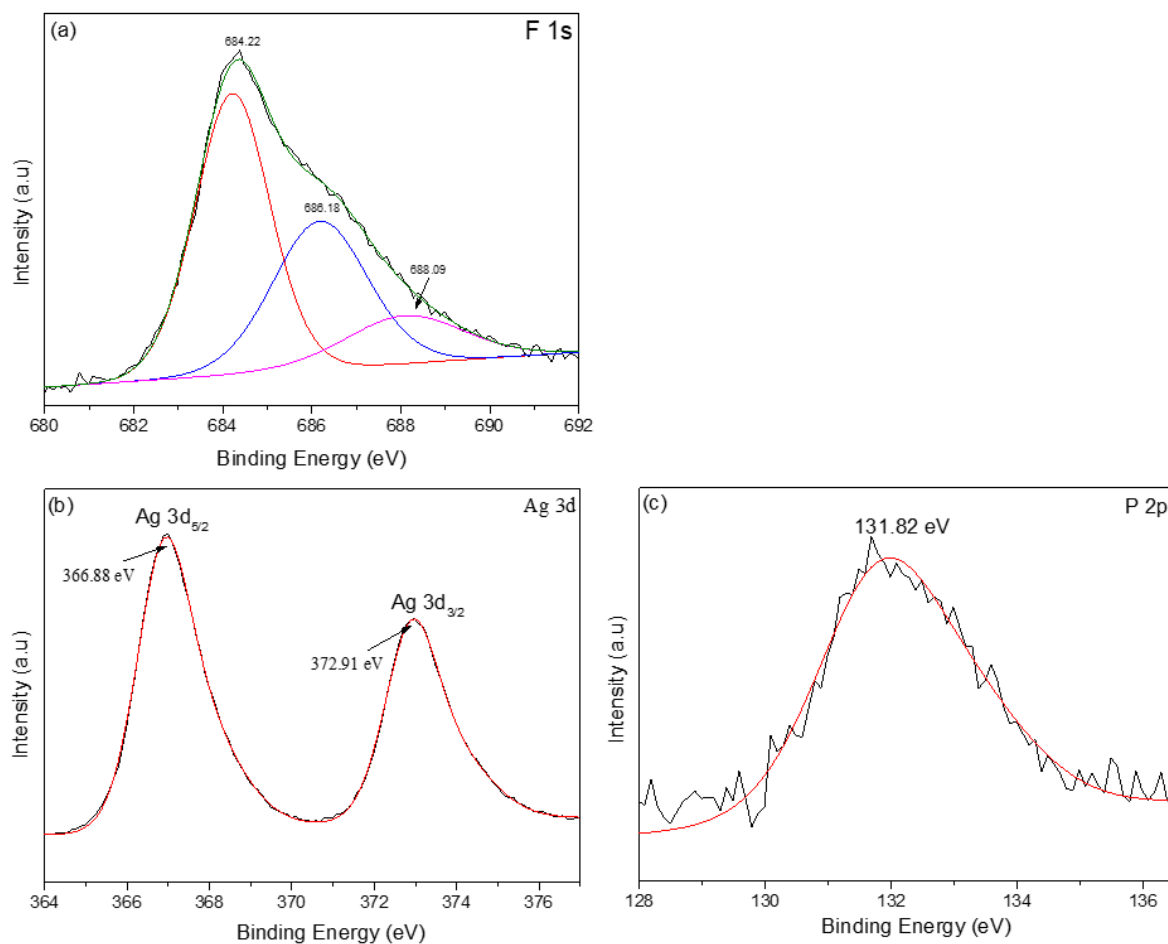

**Figure S4.** (a) F 1s high-resolution XPS spectra of  $\text{Ti}_3\text{C}_2$ , and (b-c) Ag 3d and P 1s high-resolution XPS spectra of  $\text{Ag}_3\text{PO}_4/\text{TiO}_2/\text{Ti}_3\text{C}_2$  (sample A4).

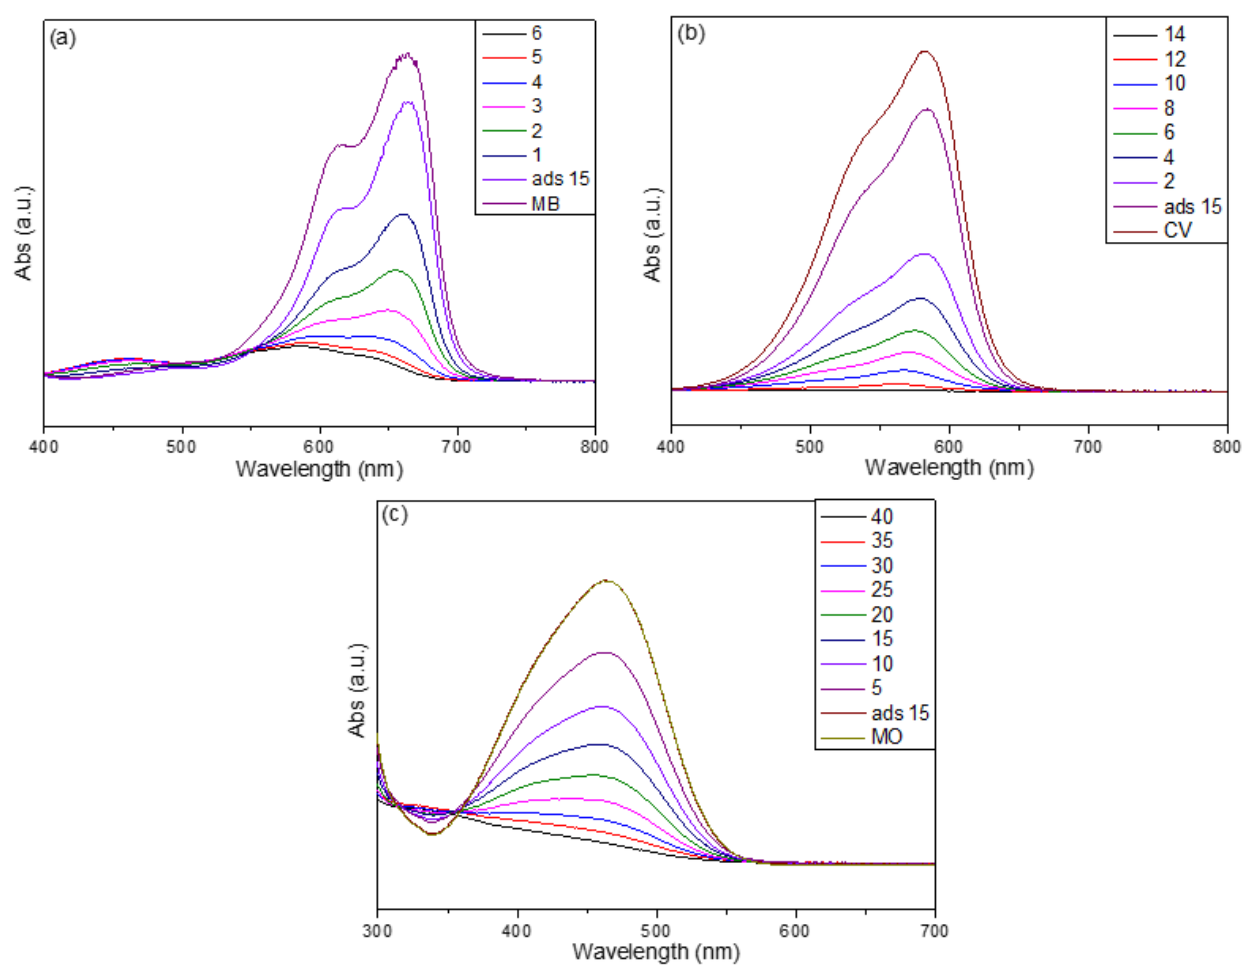

**Figure S5.** Photodegradation absorption spectra of (a) Methylene Blue, (b) Crystal Violet, (c) Methylene Orange under solar light.
